# Supplementary material for: A new general method for selective β-polynitration of porphyrins; preparation and redox properties of Zn-porphyrins bearing one through to eight β-nitro substituents and X-ray structure of the first Zn β-pernitro porphyrin
Source: Royal Society of Chemistry journal article supplement (doi:10.1039/b004160m), 2000-01-01
Supplement: b004160m.doc [file b004160m.doc]

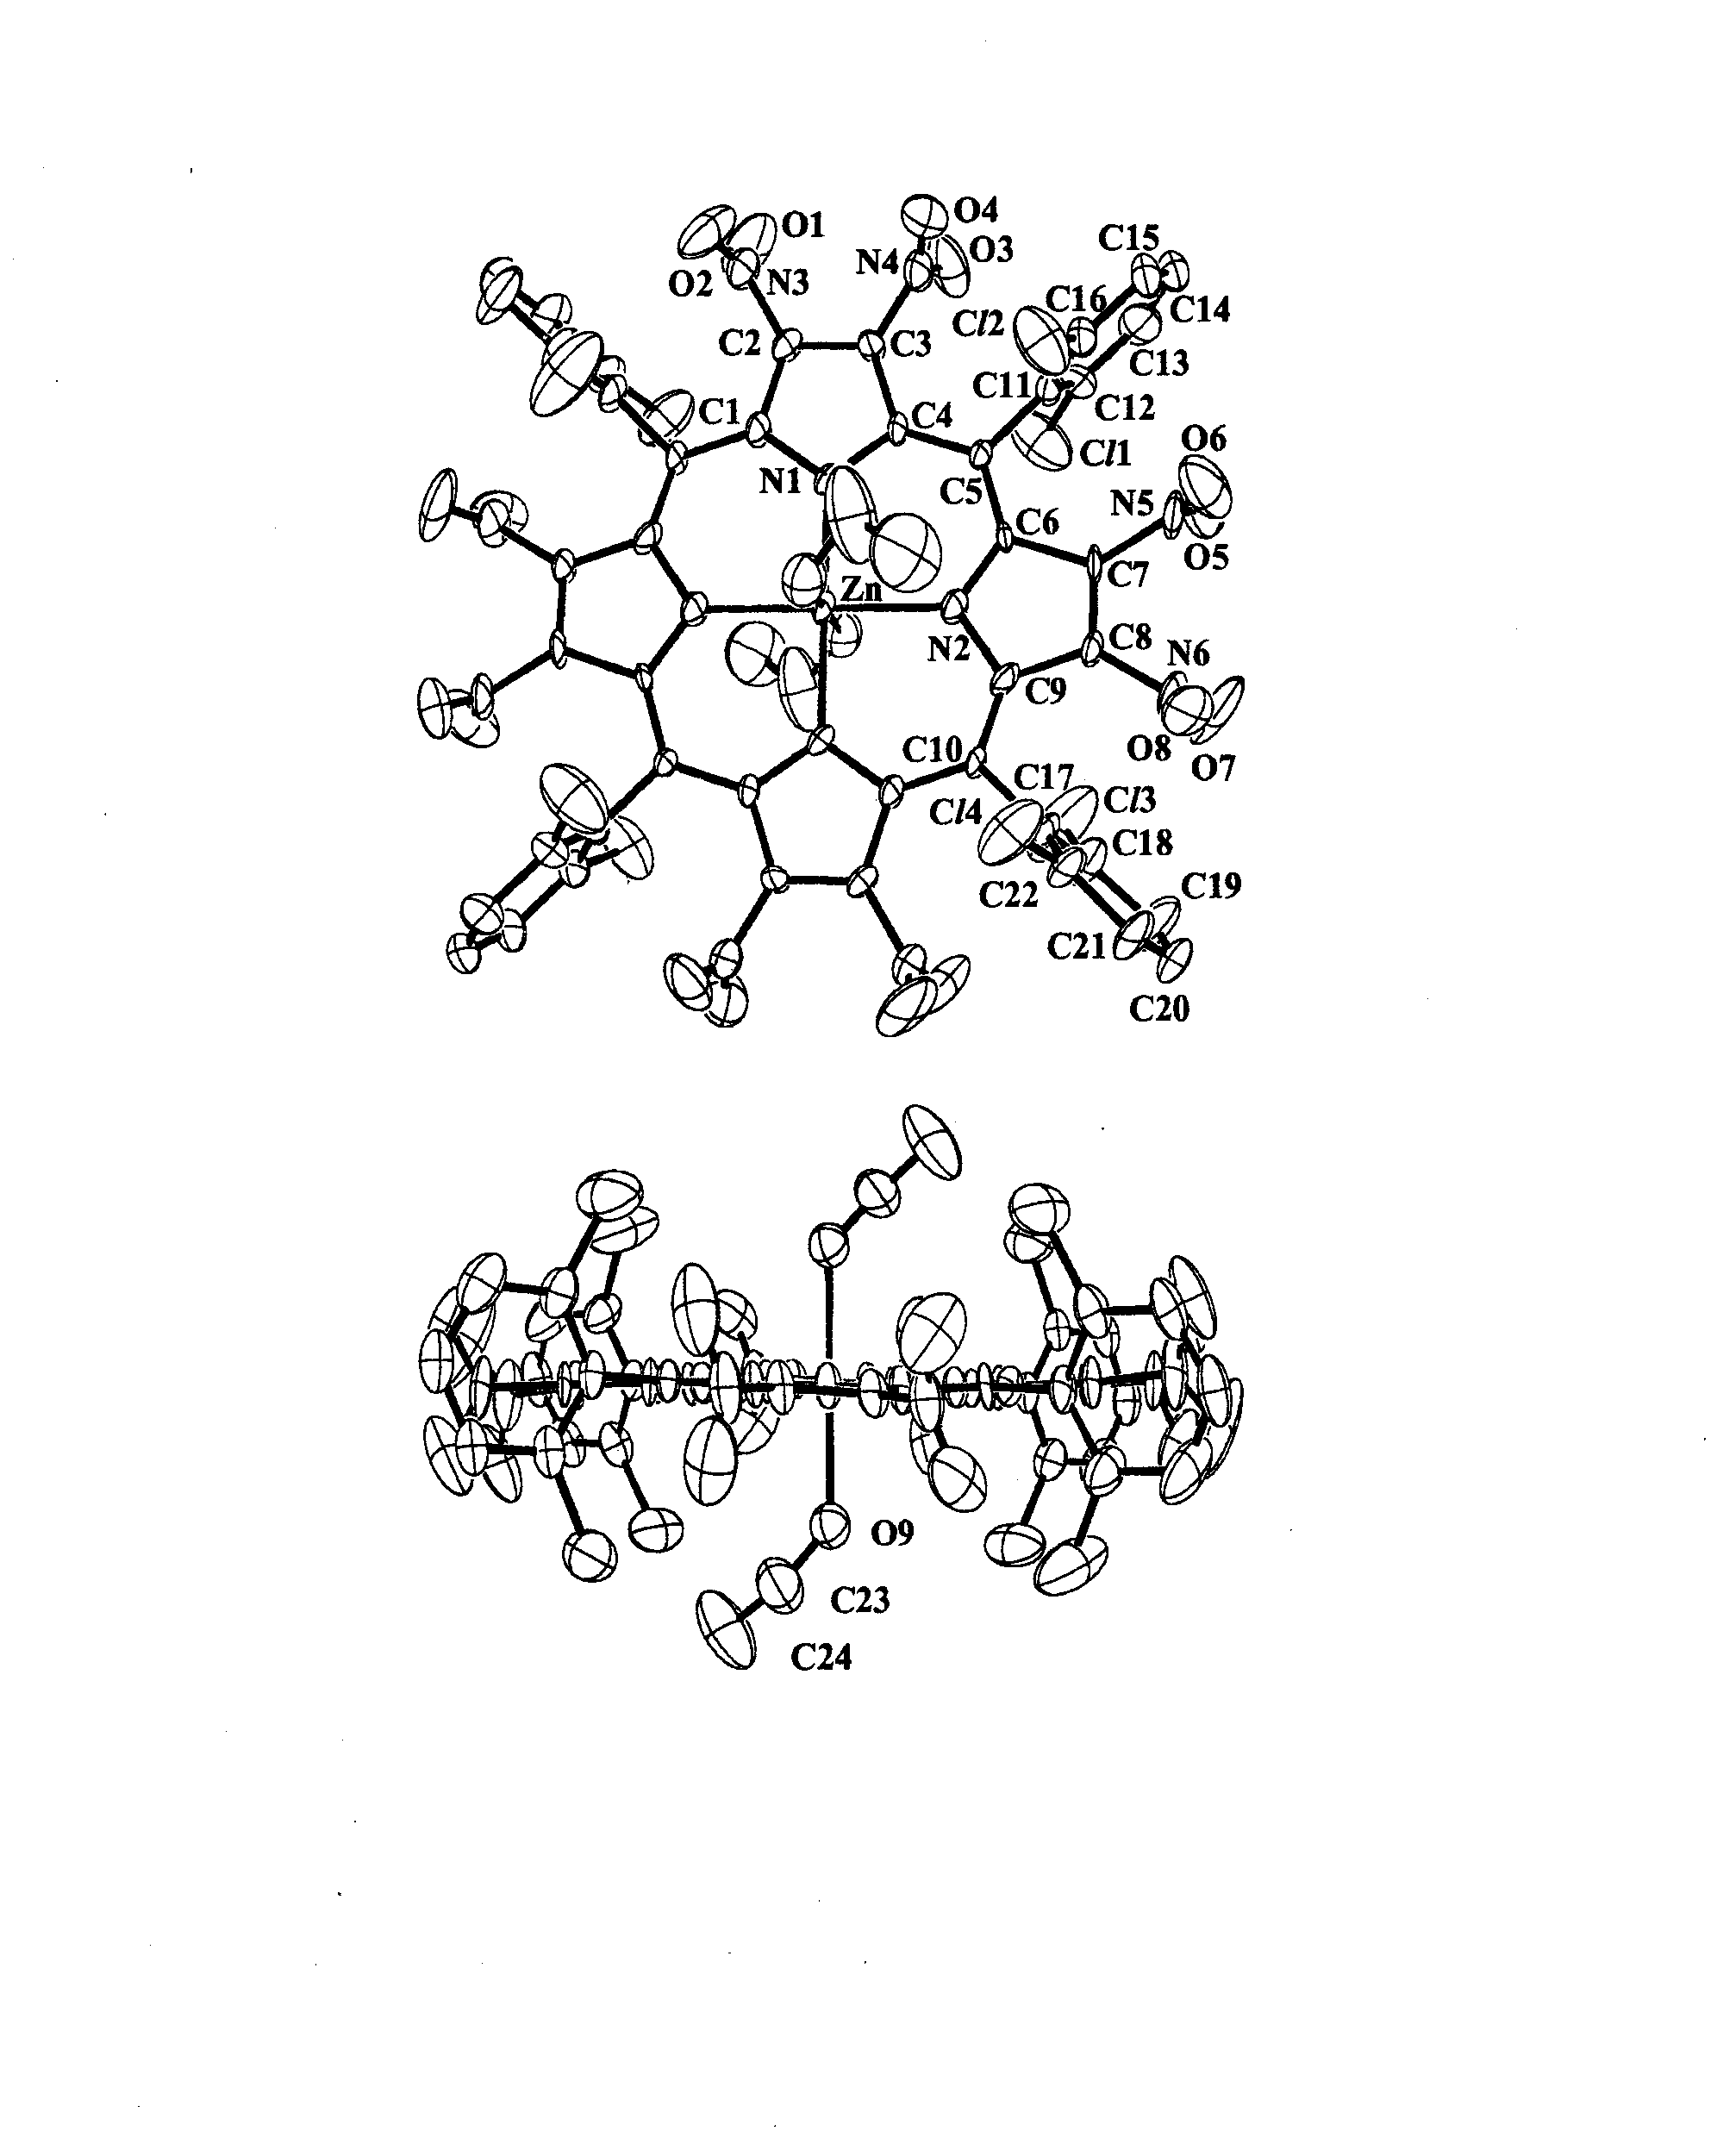


**Fig. S1** Molecular structure and atomic labelling for Zn(TDCPN8P)(EtOH)2


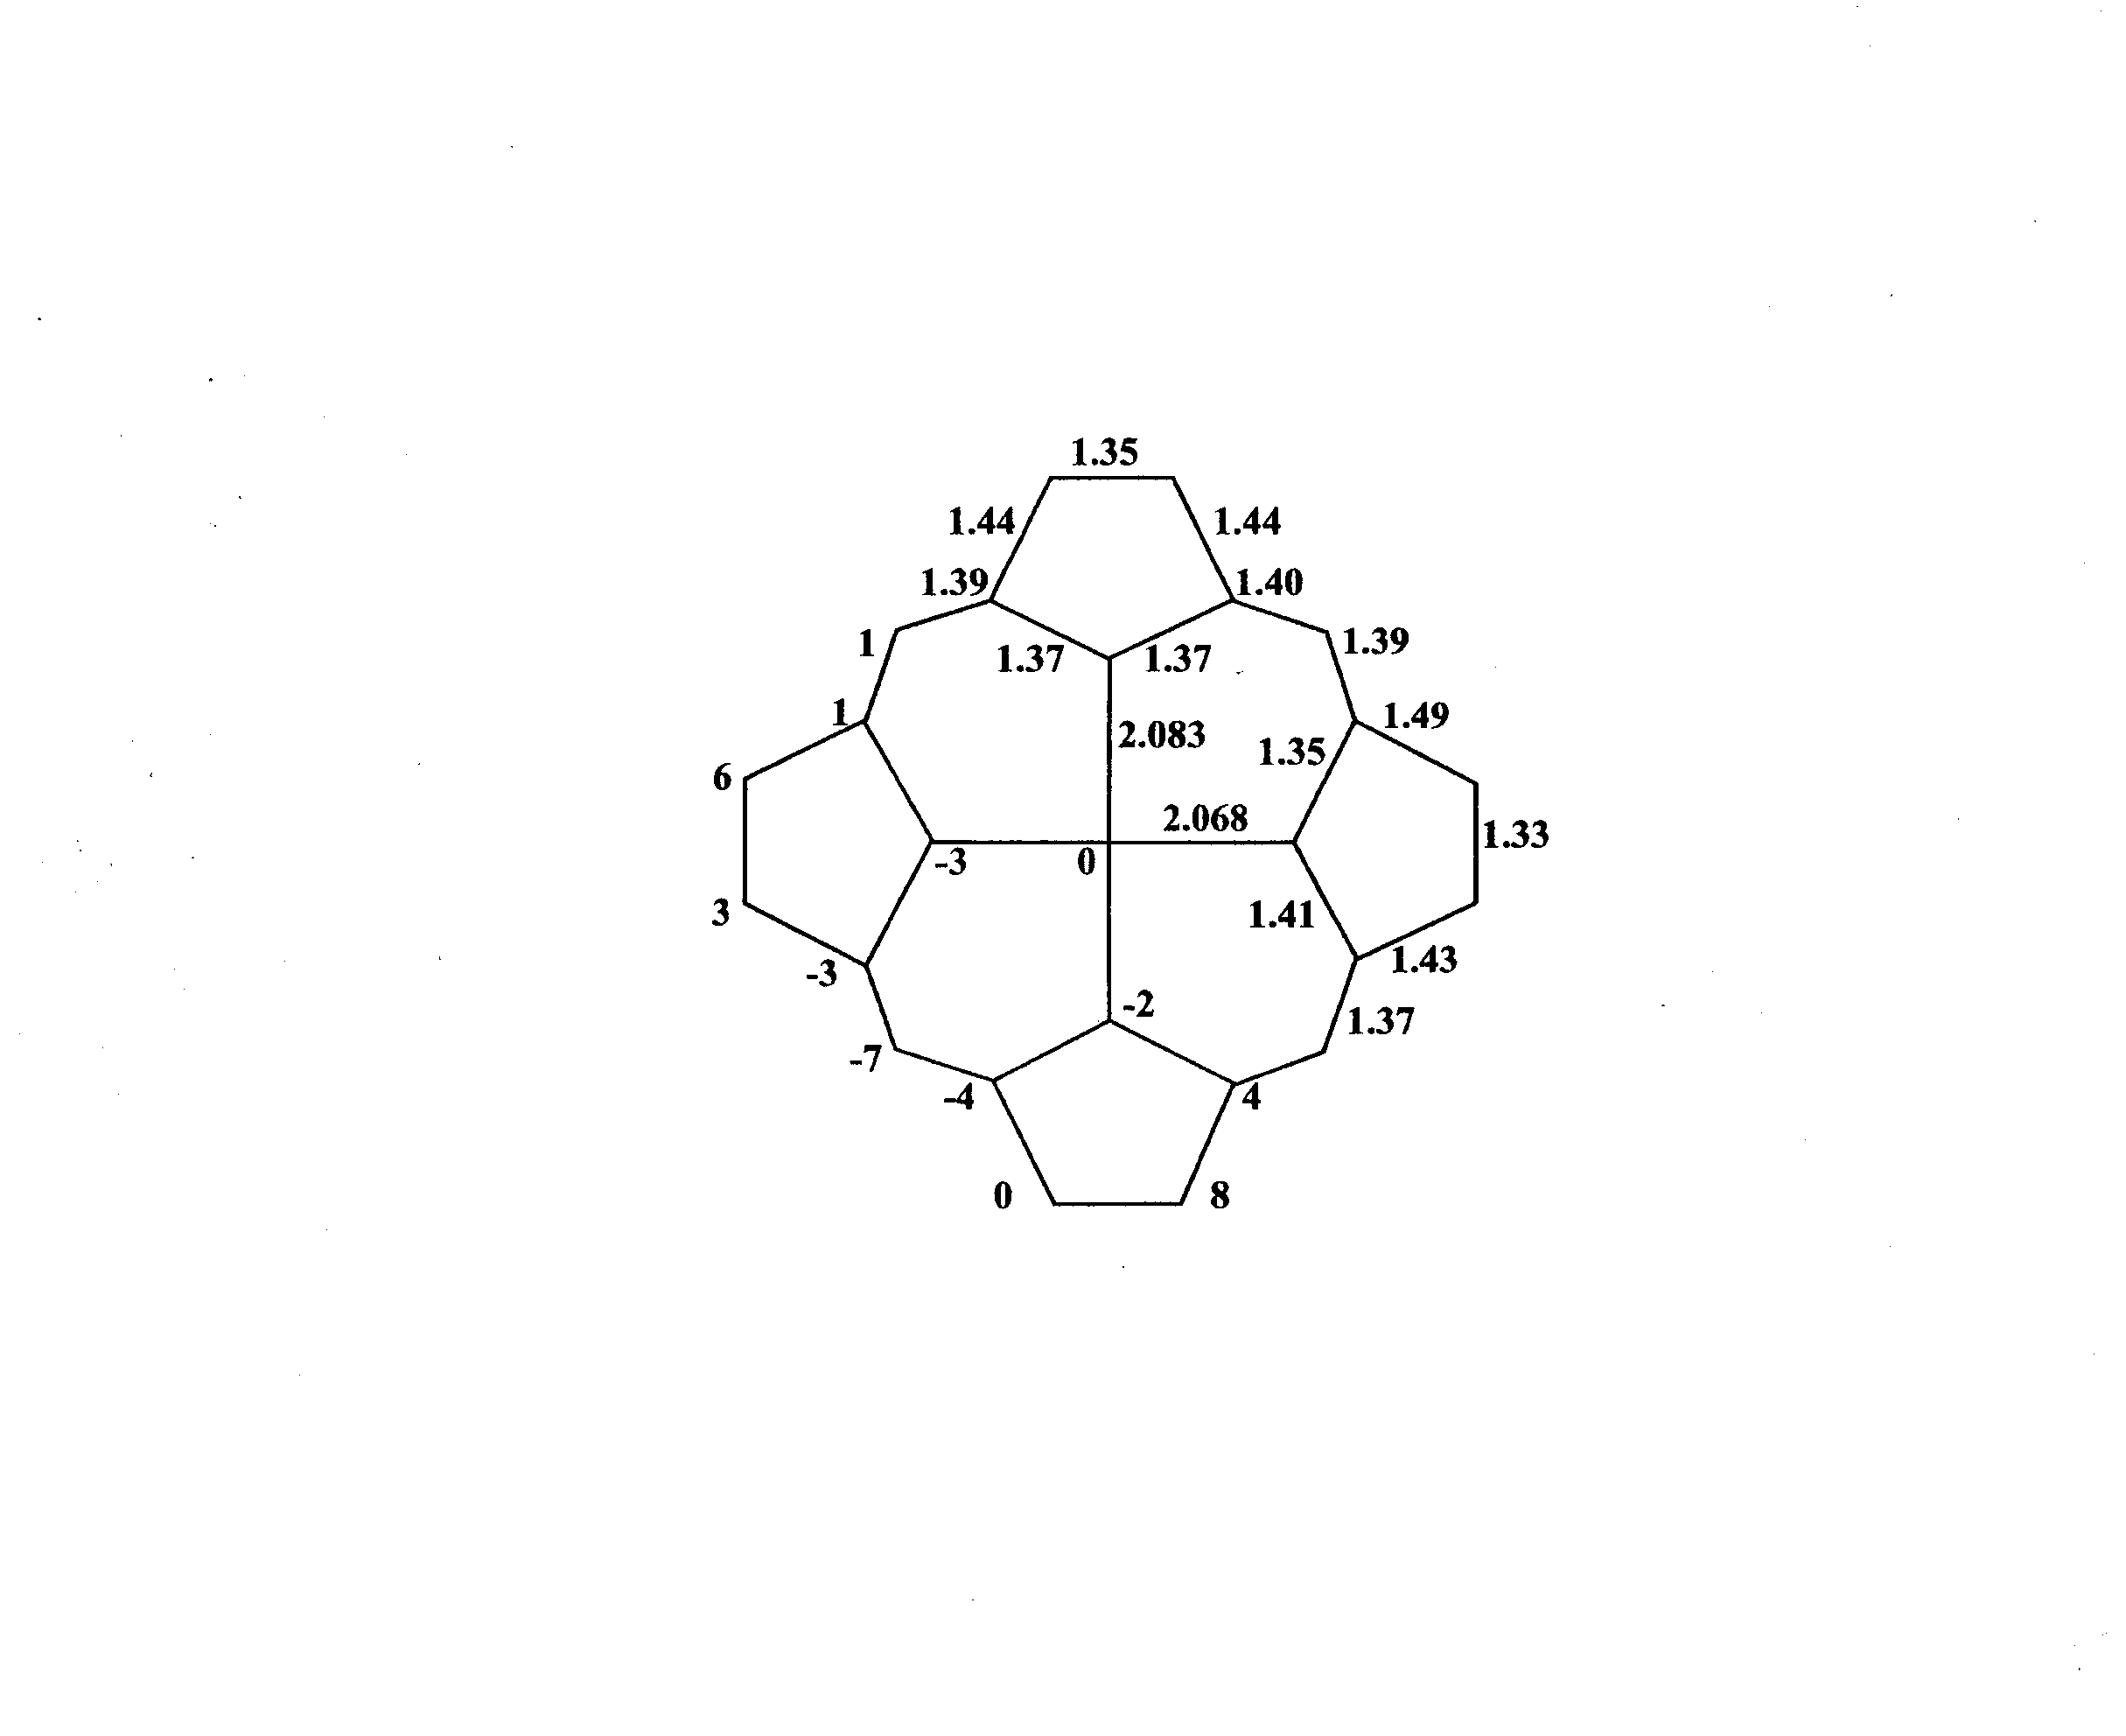


**Fig. S2** Bond distances in angstroms, and displacements from the plane of the 24-atom porphyrin core, in units of 0.01 angstroms
